# Supplementary material for: Hydrolysis of the Borohydride Anion BH4−: A 11B NMR Study Showing the Formation of Short-Living Reaction Intermediates including BH3OH−
Source: MDPI journal article supplement (doi:10.3390/molecules27061975), 2022-03-18
Supplement: s1 [file s1]

*Supplementary File*

# **Hydrolysis of the borohydride anion $\text{BH}_4^-$ : A $^{11}\text{B}$ NMR study showing the formation of short-living reaction intermediates including $\text{BH}_3\text{OH}^-$**

**Eddy Petit <sup>1</sup>, Fabrice Salles <sup>2</sup>, Damien Alligier <sup>1</sup> and Umit B. Demirci <sup>1,\*</sup>**

<sup>1</sup> Institut Européen des Membranes, IEM – UMR 5635, ENSCM, CNRS, Univ Montpellier, Montpellier, France

<sup>2</sup> ICGM, Univ. Montpellier, CNRS, ENSCM, Montpellier, France

\* Correspondence: Correspondence: [umit.demirci@umontpellier.fr](mailto:umit.demirci@umontpellier.fr)

## Supplementary Materials

|        |                   |                                                                                                                                                                                                                                                                                                                                           |
|--------|-------------------|-------------------------------------------------------------------------------------------------------------------------------------------------------------------------------------------------------------------------------------------------------------------------------------------------------------------------------------------|
| Page 2 | <b>Figure S1</b>  | <sup>11</sup> B NMR spectra of the 10-mL DMF solutions of BH <sub>4</sub> <sup>−</sup> (1.32 M) <b>hydrolyzed by 0.95 mL of alkaline</b> (0.1 M NaOH), uncatalyzed or catalyzed by Pd or Pt or Au, after 0, 24, 48 and 72 h. These spectra focus on the <u>range between <math>\delta</math> +20 ppm and <math>\delta</math> −50 ppm.</u> |
| Page 3 | <b>Figure S2</b>  | <sup>11</sup> B NMR spectra of the 10-mL DMF solutions of BH <sub>4</sub> <sup>−</sup> (1.32 M) <b>hydrolyzed by 0.95 mL of alkaline</b> (0.1 M NaOH), uncatalyzed or catalyzed by Pd or Pt or Au, after 0, 24, 48 and 72 h. These spectra focus on the <u>range between <math>\delta</math> +20 ppm and <math>\delta</math> −30 ppm.</u> |
| Page 4 | <b>Figure S3</b>  | <sup>11</sup> B NMR spectra of the 10-mL DMF solutions of BH <sub>4</sub> <sup>−</sup> (1.32 M) <b>hydrolyzed by 7.6 mL of alkaline</b> (0.1 M NaOH), uncatalyzed or catalyzed by Pd or Pt or Au, after 0, 24, 48 and 72 h. These spectra focus on the <u>range between <math>\delta</math> +20 ppm and <math>\delta</math> −50 ppm.</u>  |
| Page 5 | <b>Figure S4.</b> | Deconvolution of the multiplet located between $\delta$ −18.5 ppm and $\delta$ −23.5 ppm for the <sup>11</sup> B NMR spectrum of the 10-mL DMF solutions of BH <sub>4</sub> <sup>−</sup> (1.32 M) hydrolyzed by 7.6 mL of alkaline (0.1 M NaOH) and catalyzed by Au, after 48 and 72 h.                                                   |

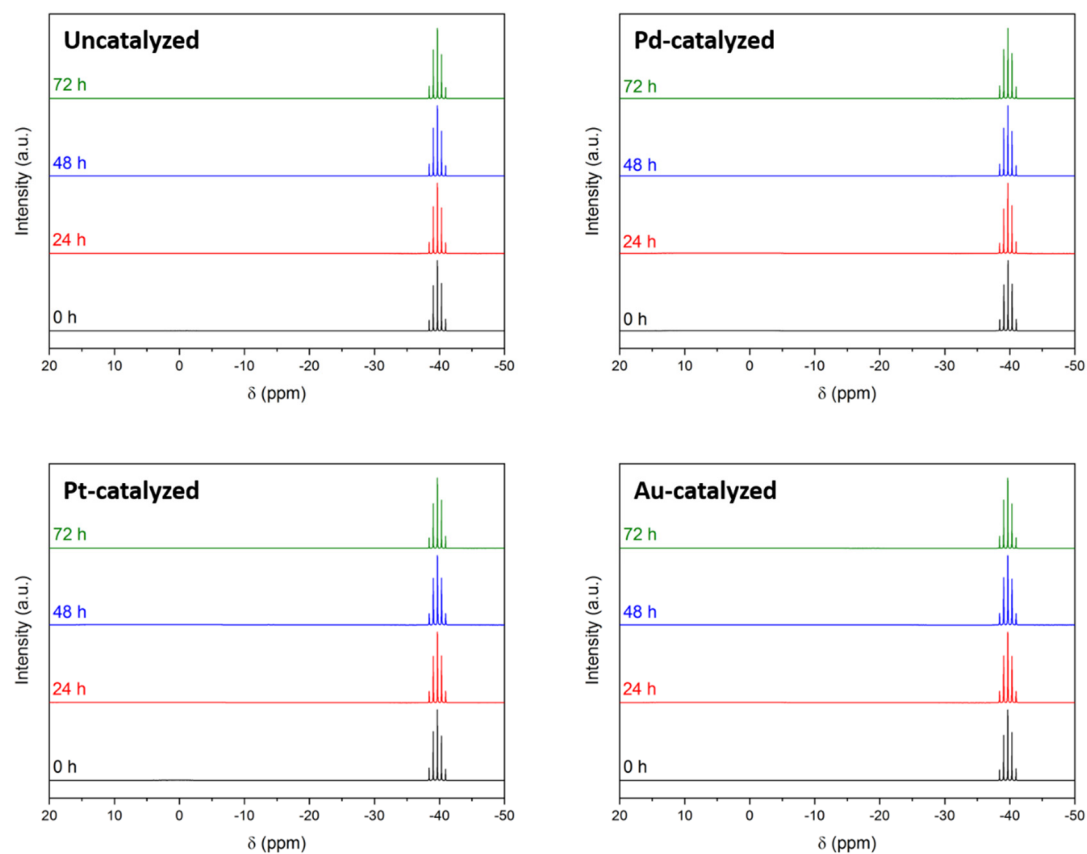

**Figure S1.**  $^{11}\text{B}$  NMR spectra of the 10-mL DMF solutions of  $\text{BH}_4^-$  (1.32 M) hydrolyzed by 0.95 mL of alkaline (0.1 M NaOH), uncatalyzed or catalyzed by Pd or Pt or Au, after 0, 24, 48 and 72 h. These spectra focus on the range between  $\delta$  +20 ppm and  $\delta$  -50 ppm.

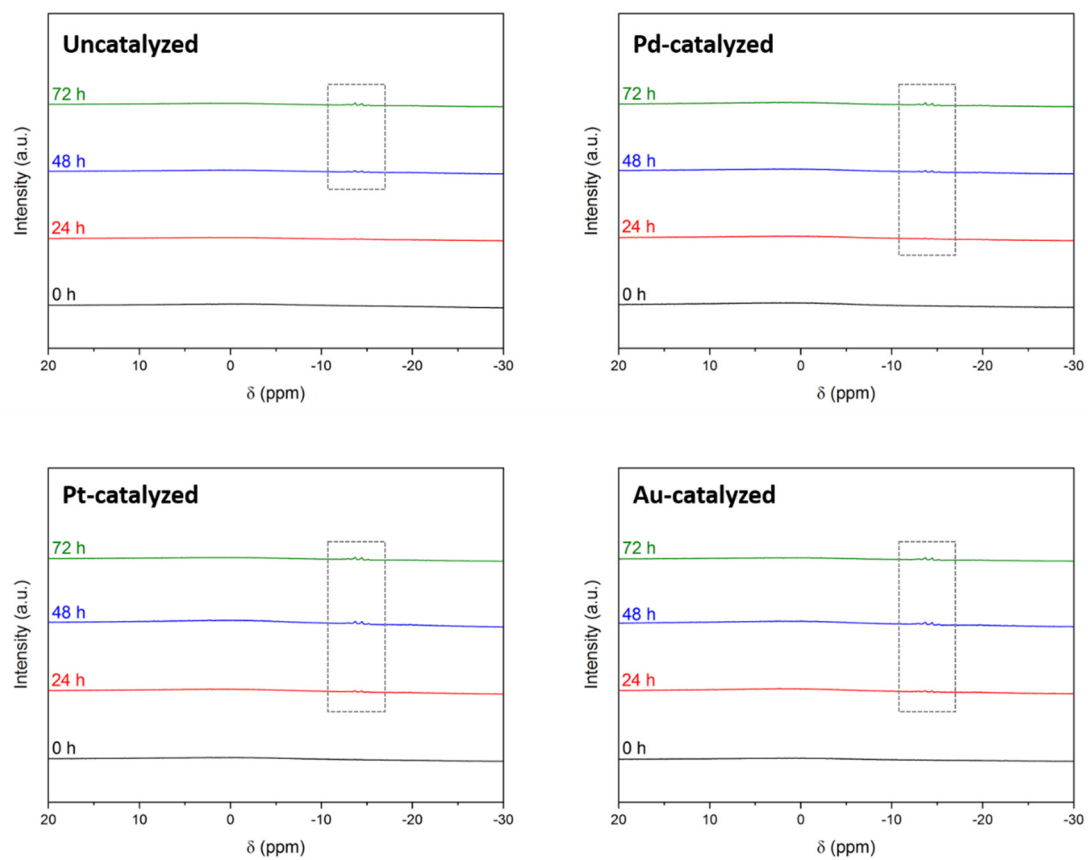

**Figure S2.**  $^{11}\text{B}$  NMR spectra of the 10-mL DMF solutions of  $\text{BH}_4^-$  (1.32 M) hydrolyzed by 0.95 mL of alkaline (0.1 M NaOH), uncatalyzed or catalyzed by Pd or Pt or Au, after 0, 24, 48 and 72 h. These spectra focus on the range between  $\delta$  +20 ppm and  $\delta$  -30 ppm.

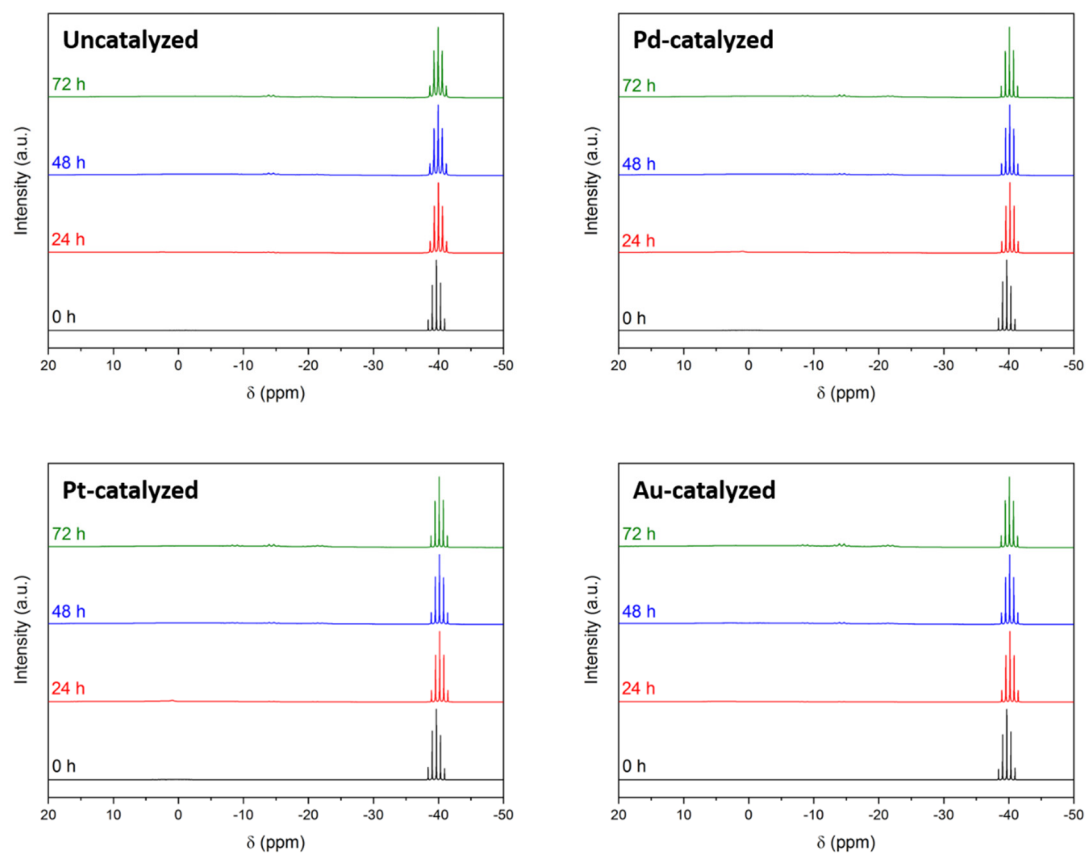

**Figure S3.**  $^{11}\text{B}$  NMR spectra of the 10-mL DMF solutions of  $\text{BH}_4^-$  (1.32 M) hydrolyzed by 7.6 mL of alkaline (0.1 M NaOH), uncatalyzed or catalyzed by Pd or Pt or Au, after 0, 24, 48 and 72 h. These spectra focus on the range between  $\delta$  +20 ppm and  $\delta$  -50 ppm.

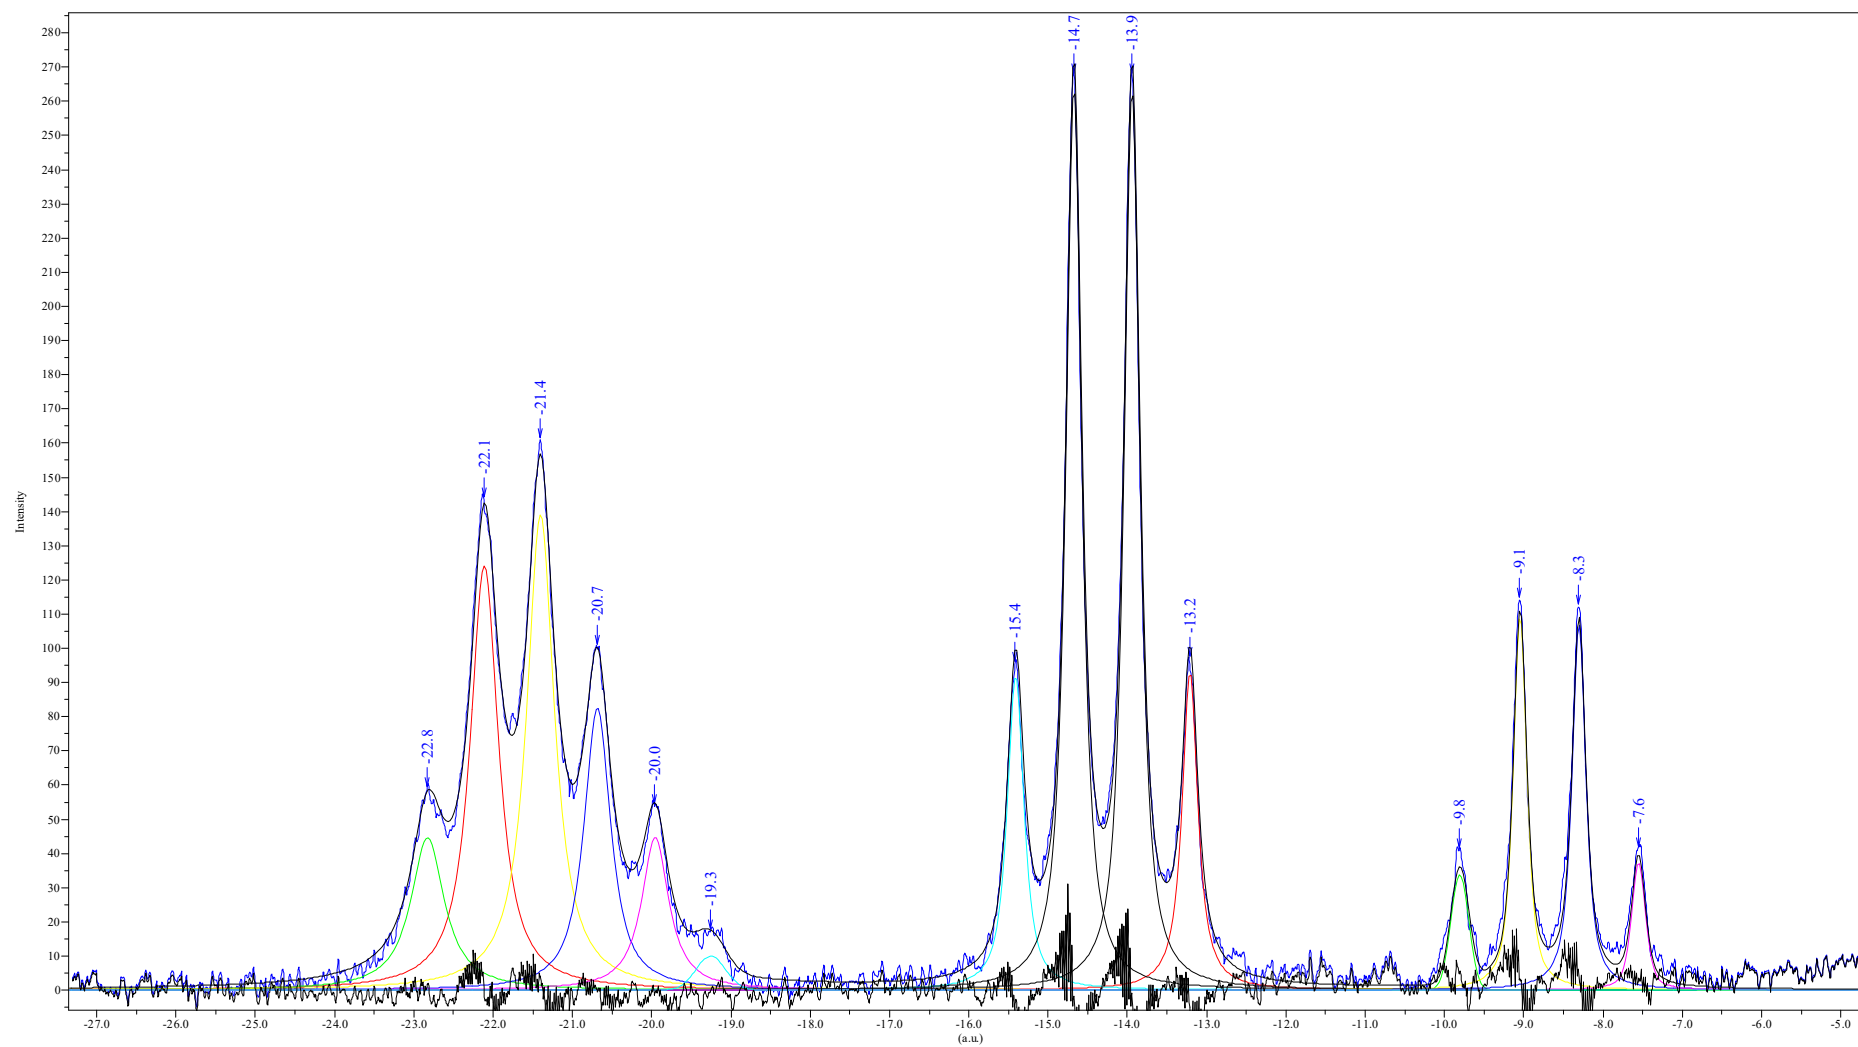

**Figure S4.** Deconvolution of the multiplet located between  $\delta$  -18.5 ppm and  $\delta$  -23.5 ppm for the  $^{11}\text{B}$  NMR spectrum of the 10-mL DMF solutions of  $\text{BH}_4^-$  (1.32 M) hydrolyzed by 7.6 mL of alkaline (0.1 M NaOH) and catalyzed by Au, after 48 and 72 h.

**Table S1.** Results of the deconvolution made for the signal shown in Figure S4. The chemical shifts, the Pascal's triangles and the deviations versus the theoretical area are shown.

| $\delta$ (ppm) | Pascal's triangle |      | Deviations (%) |
|----------------|-------------------|------|----------------|
| -22.8334       | 1                 | 0.09 | -23            |
| -22.1179       | 3                 | 0.28 | 0              |
| -21.4085       | 3 + 1             | 0.31 | 0              |
| -20.6915       | 1 + 3             | 0.19 | 11             |
| -19.9621       | 3                 | 0.1  | 0              |
| -19.2616       | 1                 | 0.03 | 104            |
